# Supplementary material for: Results of the extended analysis for cancer treatment (EXACT) trial: a prospective translational study evaluating individualized treatment regimens in oncology
Source: PubMed Central journal article supplement (PMC6398177; doi:10.18632/oncotarget.26604), 2019-01-29
Supplement: oncotarget-10-942-s001.pdf [file oncotarget-10-942-s001.pdf]

# Results of the extended analysis for cancer treatment (EXACT) trial: a prospective translational study evaluating individualized treatment regimens in oncology

## SUPPLEMENTARY MATERIALS

### Immunohistochemistry

Immunohistochemistry was done with 2 µm thin FFPE tissue sections. The used primary antibodies are described in Table 1. The immunohistochemistry was performed with a Ventana Benchmark Ultra stainer (Ventana, Tucson, AZ) with extended heat-induced epitope retrieval with CC1 buffer and the ultraView Universal DAB Detection Kit (Ventana) or with a Bond III stainer (Leica Biosystems, Vienna, Austria) for CD20 and CD30.

The antibodies were either CE and/or IVD marked or for research use only and validated at the Institute of Pathology at the Medical University Vienna for diagnostic use with appropriate positive and negative tissue controls and isotype-matched control antibodies.

### Fluorescence *in-situ* hybridisation (FISH)

FISH was performed with 4 µm thick FFPE tissue sections. The following FISH probes were employed: ALK (2p23.1; Abbott, Abbott Park, IL), RET(10q11; Kreatech, Berlin, Germany), PTEN (10q23.31)/Centromer 10) and ROS1 (Zytovision, Bremerhaven, Germany). 200 cell nuclei per tumor were evaluated. To detect HER2, two diagnostic systems were applied: FISH (PathVysion II; Abbott) and CISH (Ventana Medical Systems by Roche Diagnostics).

**Supplementary Table 1: Antibodies used for immunohistochemistry**

| Antibody             | Clone             | Supplier                   | Regulatory status      | Antibody Dilution         | Scoring                                                                            | Cut-off                                                                        | Reference |
|----------------------|-------------------|----------------------------|------------------------|---------------------------|------------------------------------------------------------------------------------|--------------------------------------------------------------------------------|-----------|
| ALK                  | 1A4               | Ventana                    | IVD@                   | 1:50                      | IHC score*                                                                         | Presence of reactive neoplastic cells (IHC score >0) and translocation by FISH | [1]       |
| CD20                 | L26               | Dako                       | CE-IVD <sup>+</sup>    | 1:400                     | % positive tumor cells                                                             | Percentage of reactive neoplastic cells                                        | [2]       |
| CD30                 | BERH2             | Dako                       | CE-IVD                 | 1:50                      | % positive tumor cells                                                             | Percentage of reactive neoplastic cells                                        | [3]       |
| EGFR                 | 3C6               | Ventana                    | IVD                    | prediluted - ready to use | IHC score*                                                                         | IHC score 200-300                                                              | [4]       |
| Estrogen-receptor    | SP1               | Ventana                    | IVD                    | prediluted - ready to use | Allred Score, ref. (5)                                                             | Allred Score $\geq$ 3                                                          | [6]       |
| HER2                 | 4B5               | Ventana                    | FDA <sup>#</sup> , IVD | prediluted - ready to use | Scoring scale of 0 to 3+ according to guidelines described by Ventana <sup>#</sup> | Score $\geq$ 2 and confirmed amplification by CISH and/or FISH                 | [7]       |
| HER3                 | SP71              | Abcam                      | RUO <sup>\$</sup>      | 1:100                     | IHC score*                                                                         | IHC Score 100-300                                                              | [8]       |
| KIT                  | 9.7               | Ventana                    | CE                     | prediluted - ready to use | IHC score*                                                                         | IHC Score 100-300                                                              | [9]       |
| MET                  | SP44              | Ventana                    | IVD                    | prediluted - ready to use | Four subgroups, according to ref. (10)                                             | Score $\geq$ 2+                                                                | [11]      |
| mTOR                 | 49F9              | Cell Signalling Technology | RUO                    | 1:50                      | IHC score*                                                                         | IHC Score 100–300 and PTEN loss                                                | [12]      |
| PDGFRA               | rabbit polyclonal | Thermo Fisher Scientific   | RUO                    | 1:50                      | IHC score*                                                                         | IHC score 100–300                                                              | [13]      |
| PDGFRB               | 28E1              | Cell Signalling Technology | RUO                    | 1:50                      | IHC score*                                                                         | IHC score 200–300                                                              | [13]      |
| PD-L1                | E1L3N             | Cell Signalling Technology | RUO                    | 1:50                      | % positive tumor cells                                                             | Presence of reactive neoplastic cells $\geq$ 1                                 | [14]      |
| Progesteron-receptor | 1E2               | Ventana                    | IVD                    | prediluted - ready to use | Allred Score, ref. [5]                                                             | Allred Score $\geq$ 6                                                          | [15]      |
| PTEN                 | Y184              | Abcam                      | IVD                    | 1:50                      | IHC score*                                                                         | IHC Score 0                                                                    | [16]      |
| ROS1                 | D4D6              | Cell Signalling Technology | RUO                    | 1:50                      | IHC score*                                                                         | Presence of reactive neoplastic cells (IHC score >0) and translocation by FISH | [17]      |

\*An immunohistochemical score (IHC score) was determined by multiplying the percentage of positive cells by their respective staining intensity (0 = negative, 1 = weak, 2 = moderate, 3 = strong). Immunohistochemical score (maximum 300) = (% negative  $\times$  0) + (% weak  $\times$  1) + (% moderate  $\times$  2) + (% strong  $\times$  3).

# Equivocal 2+ staining cases were additionally analysed by DNA in-situ hybridisation to validate for HER2 gene amplification

@ For in vitro diagnostic use

+ CE, certification mark that indicates conformity with health, safety, and environmental protection standards for products sold within the European Economic Area (EEA).

FDA## US Food and Drug Administration approved

\$ for research use only

## REFERENCES

1. Wang Q, Zhao L, Yang X, Wei S, Zeng Y, Mao C, Lin L, Fu P, Lyu L, Li Z, Xiao H. Antibody 1A4 with routine immunohistochemistry demonstrates high sensitivity for ALK rearrangement screening of Chinese lung adenocarcinoma patients: A single-center large-scale study. *Lung Cancer*. 2016; 95:39–43.
2. Mason DY, Comans-Bitter WM, Cordell JL, Verhoeven MA, van Dongen JJ. Antibody L26 recognizes an intracellular epitope on the B-cell-associated CD20 antigen. *The American journal of pathology*. 1990; 136:1215–22.
3. Schwarting R, Gerdes J, Durkop H, Falini B, Pileri S, Stein H. BER-H2: a new anti-Ki-1 (CD30) monoclonal antibody directed at a formol-resistant epitope. *Blood*. 1989; 74:1678–89.
4. Mascaux C, Wynes MW, Kato Y, Tran C, Asuncion BR, Zhao JM, Gustavson M, Ranger-Moore J, Gaire F, Matsubayashi J, Nagao T, Yoshida K, Ohira T, et al. EGFR Protein Expression in Non-Small Cell Lung Cancer Predicts Response to an EGFR Tyrosine Kinase Inhibitor – A Novel Antibody for Immunohistochemistry or AQUA Technology. *Clin Cancer Res*. 2011; 17:7796–807.
5. Fitzgibbons PL, Dillon DA, Alsabeh R, Berman MA, Hayes DF, Hicks DG, Hughes KS, Nofech-Mozes S. Template for reporting results of biomarker testing of specimens from patients with carcinoma of the breast. *Arch Pathol Lab Med*. 2014; 138:595–601.
6. Welsh AW, Harigopal M, Wimberly H, Prasad M, Rimm DL. Quantitative Analysis of Estrogen Receptor Expression Shows SP1 antibody is more sensitive than 1D5. *Appl Immunohistochem Mol Morphol*. 2013; 21:139–47.
7. Ruschoff J, Dietel M, Baretton G, Arbogast S, Walch A, Monges G, Chenard MP, Penault-Llorca F, Nagelmeier I, Schlake W, Höfler H, Kreipe HH. HER2 diagnostics in gastric cancer—guideline validation and development of standardized immunohistochemical testing. *Virchows Arch*. 2010; 457:299–307.
8. Lédel F, Hallström M, Ragnhammar P, Öhrling K, Edler D. HER3 expression in patients with primary colorectal cancer and corresponding lymph node metastases related to clinical outcome. *Eur J Cancer*. 2014; 50:656–62.
9. Hornick JL, Fletcher CD. Immunohistochemical staining for KIT (CD117) in soft tissue sarcomas is very limited in distribution. *Am J Clin Pathol*. 2002; 117:188–93.
10. Spigel DR, Ervin TJ, Ramlau RA, Daniel DB, Goldschmidt JH Jr, Blumenschein GR Jr, et al. Randomized phase II trial of Onartuzumab in combination with erlotinib in patients with advanced non-small-cell lung cancer. *J Clin Oncol*. 2013; 31:4105–14.
11. Dziadziuszko R, Wynes MW, Singh S, Asuncion BR, Ranger-Moore J, Konopa K, Rzyman W, Szostakiewicz B, Jassem J, Hirsch FR. Correlation between MET Gene Copy Number by Silver in Situ Hybridization and Protein Expression by Immunohistochemistry in Non-Small-Cell Lung Cancer. *J Thorac Oncol*. 2012; 7:340–7.
12. Leal P, Garcia P, Sandoval A, Letelier P, Brebi P, Ili C, Álvarez H, Tapia O, Roa JC. Immunohistochemical expression of phospho-mTOR is associated with poor prognosis in patients with gallbladder adenocarcinoma. *Arch Pathol Lab Med*. 2013; 137:552–7.
13. Bergsten E, Uutela M, Li X, Pietras K, Ostman A, Heldin CH, et al. PDGF-D is a specific, protease-activated ligand for the PDGF beta-receptor. *Nat Cell Biol*. 2001; 3:512–6.
14. Sholl LM, Aisner DL, Allen TC, Beasley MB, Borczuk AC, Cagle PT, Capelozzi V, Dacic S, Hariri L, Kerr KM, Lantuejoul S, Mino-Kenudson M, Raparia K, et al. Programmed Death Ligand-1 Immunohistochemistry--A New Challenge for Pathologists: A Perspective From Members of the Pulmonary Pathology Society. *Arch Pathol Lab Med*. 2016; 140:341-4.
15. Ibrahim M, Dodson A, Barnett S, Fish D, Jasani B, Miller K. Potential for false-positive staining with a rabbit monoclonal antibody to progesterone receptor (SP2): findings of the UK National External Quality Assessment Scheme for Immunocytochemistry and FISH highlight the need for correct validation of antibodies on introduction to the laboratory. *Am J Clin Pathol*. 2008; 129:398–409.
16. Akesson E, Gallos ID, Ganesan R, Varma R, Gupta JK. Prognostic significance of estrogen and progesterone receptor expression in LNG-IUS (Mirena) treatment of endometrial hyperplasia: an immunohistochemical study. *Acta Obstet Gynecol Scand*. 2010; 89:393–8.
17. Sholl LM, Sun H, Butaney M, Zhang C, Lee C, Janne PA, et al. ROS1 immunohistochemistry for detection of ROS1-rearranged lung adenocarcinomas. *Am J Surg Pathol*. 2013; 37:1441–9.

MET

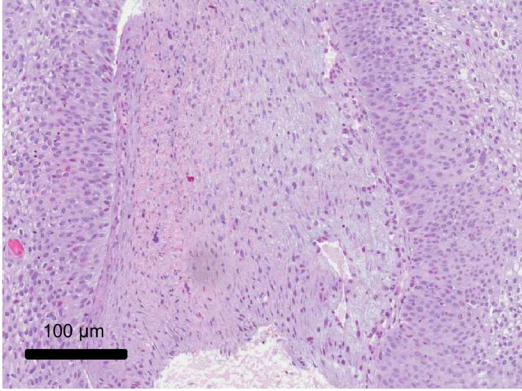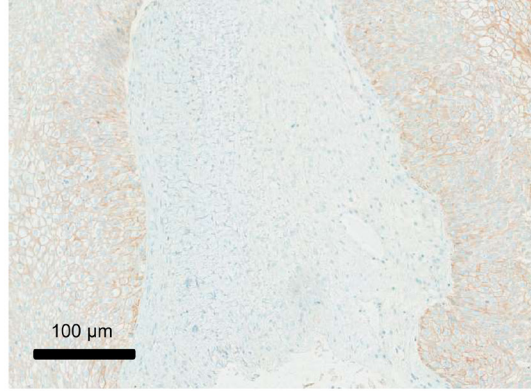

KIT

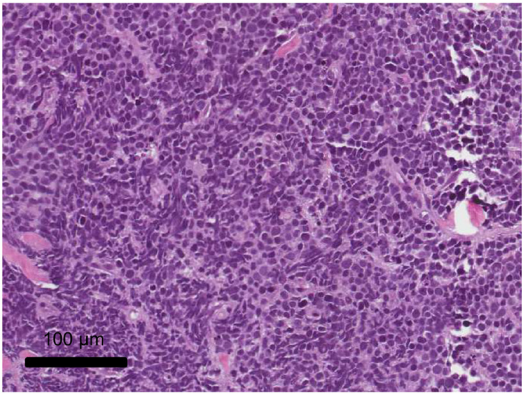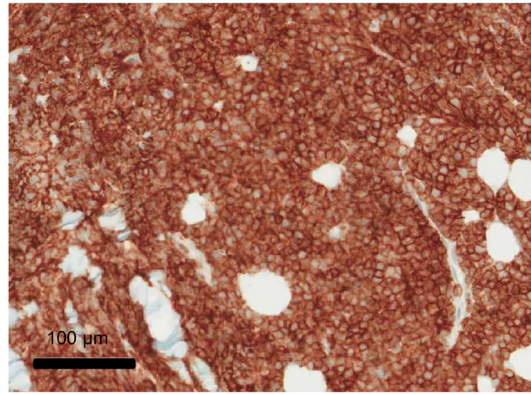

PDGFR $\alpha$

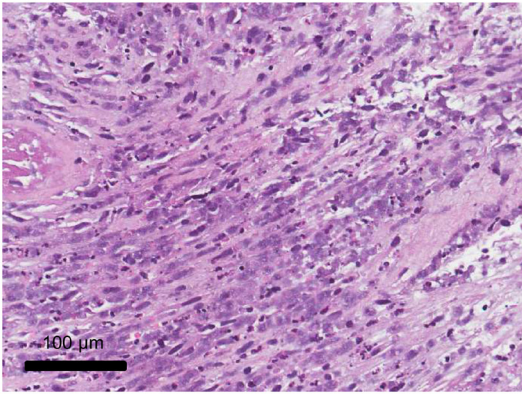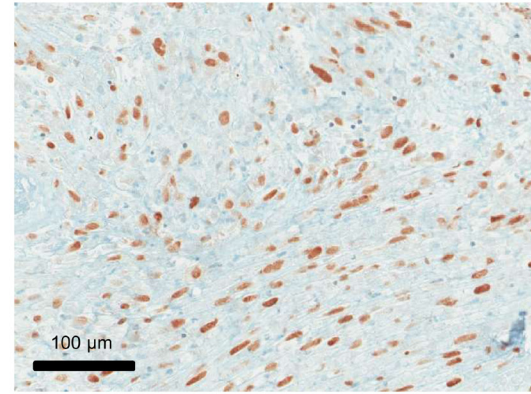

PDGFR $\beta$

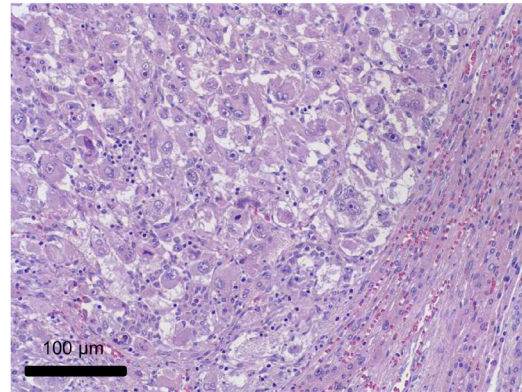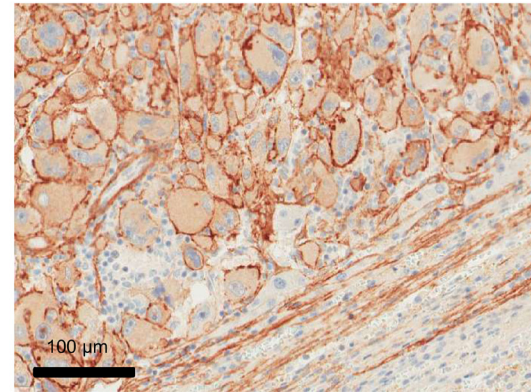

mTOR

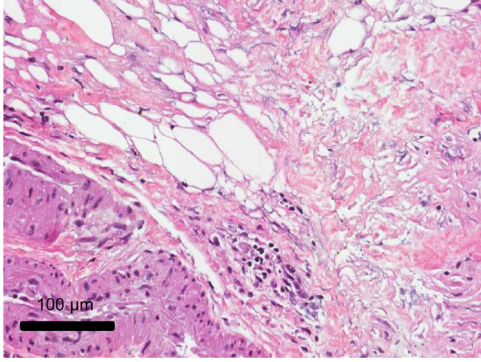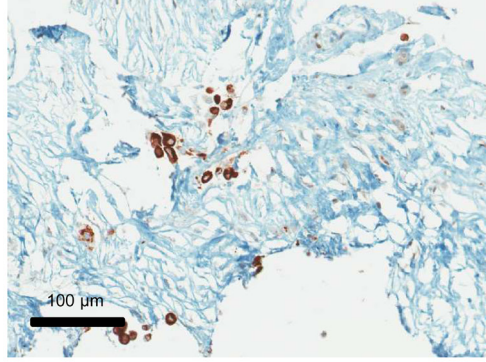

HER3

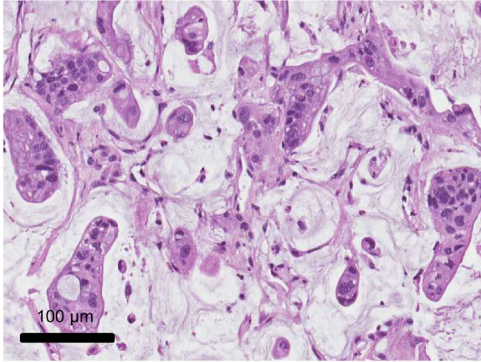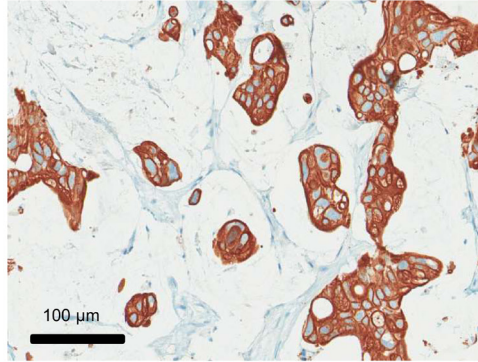

PDL-1

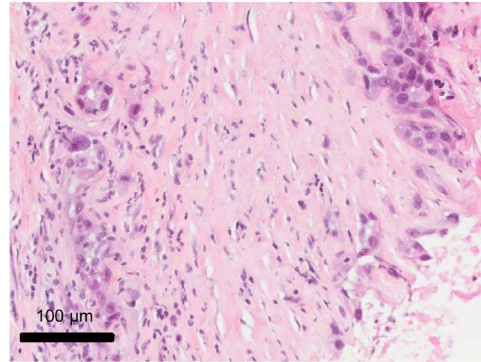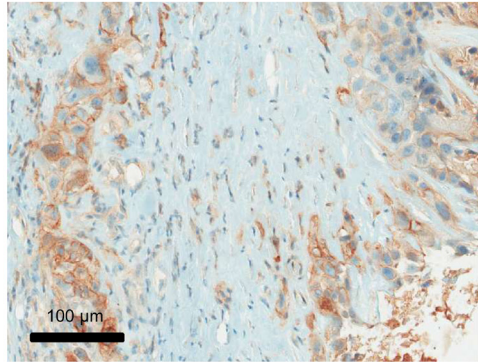

HER2

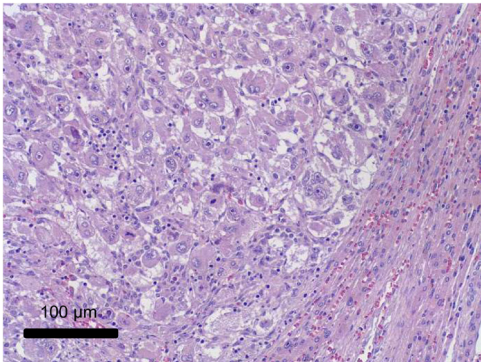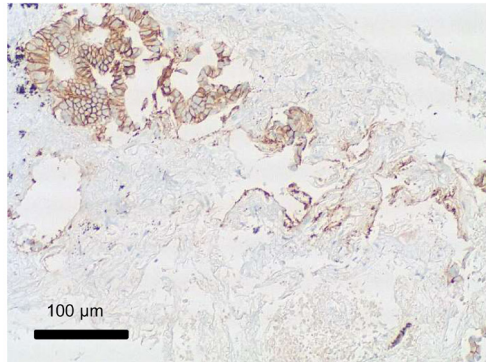

PR

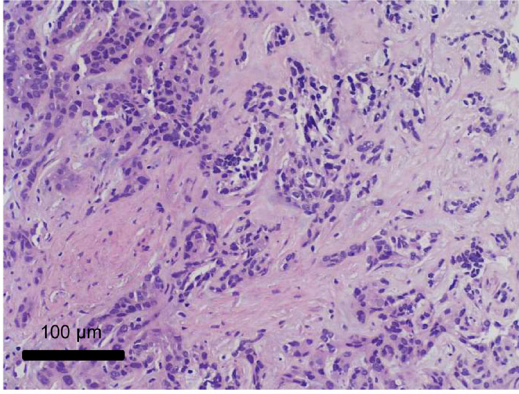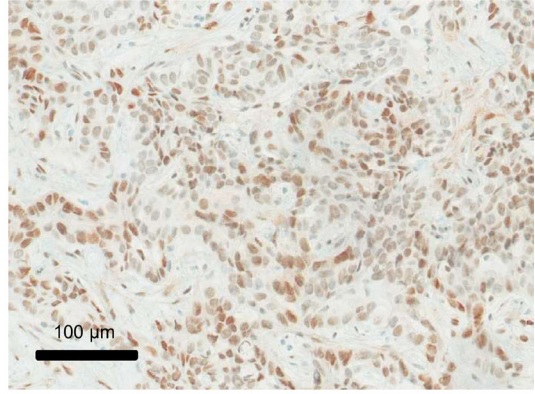

CD20

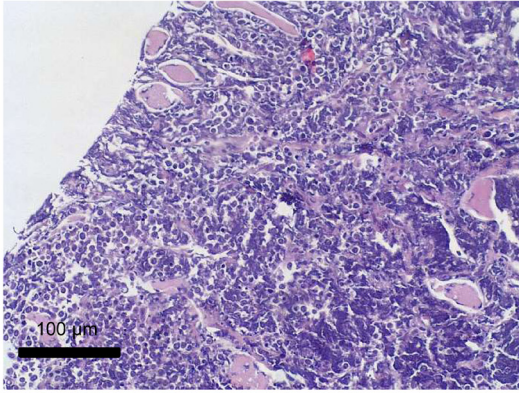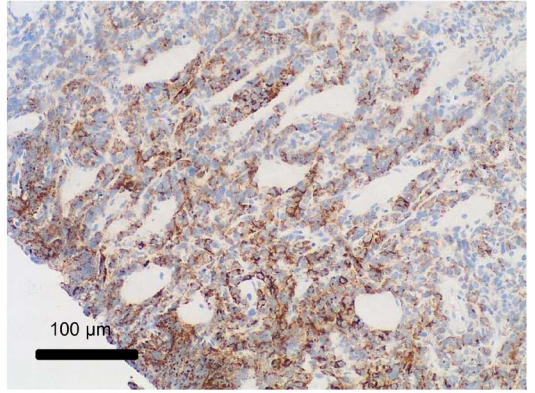

EGFR

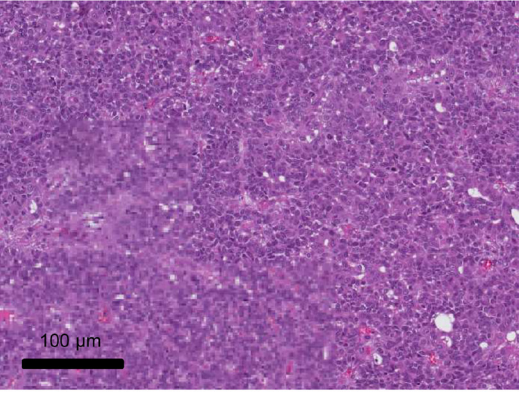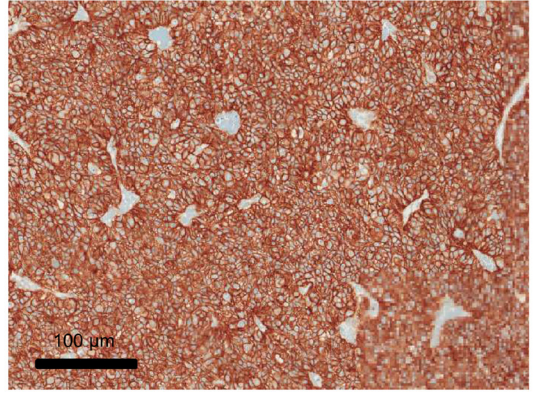

PTEN

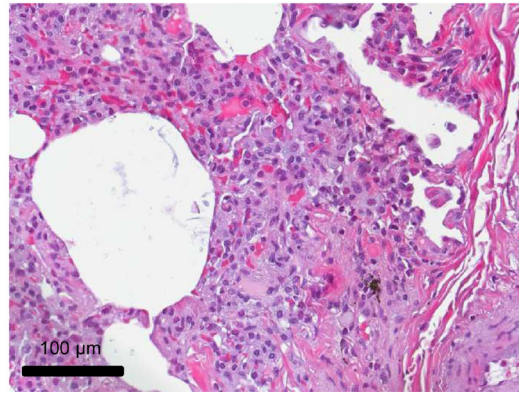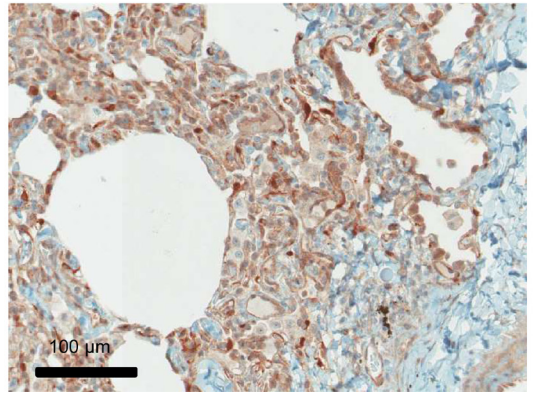

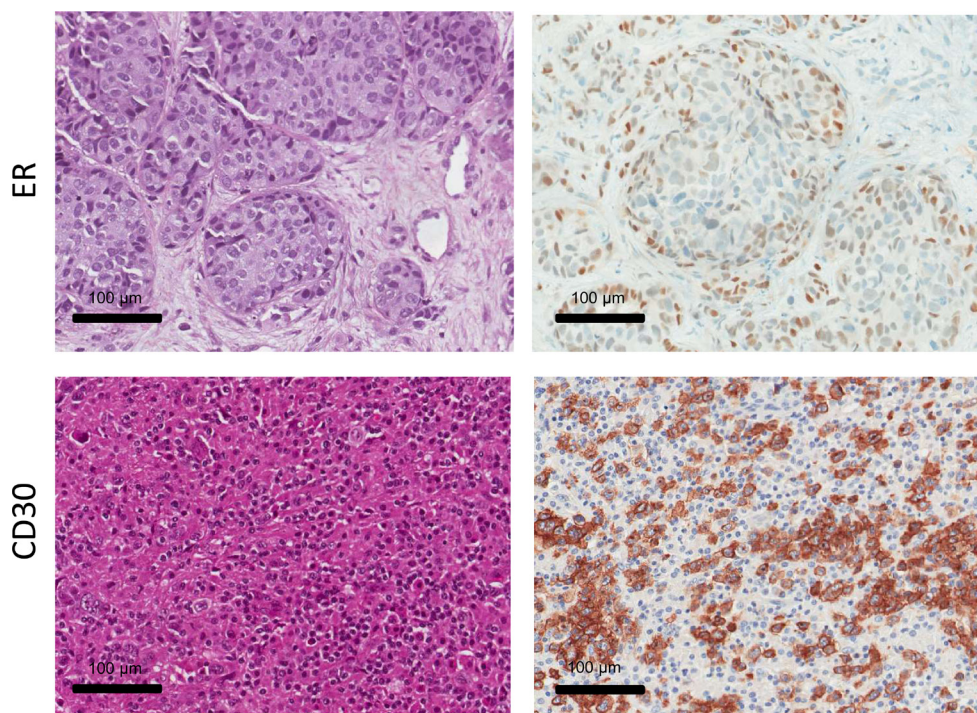

**Supplementary Figure 1: Representative images of hematoxylin and eosin staining (on the left) and immunohistochemical staining of tumors (on the right).** The scoring of the depicted immunoreactivity positive cases are: MET: 3+; KIT: IHC Score 300; PDGFR $\alpha$ : IHC Score 200, PDGFR $\beta$ : IHC Score 300; mTOR: IHC Score 99, HER3: IHC Score 300, PDL-1: 85%; HER2: 2+; PR: Allred Score 6; CD20: 95%; EGFR: IHC Score 300, PTEN: IHC Score 250; ER: Allred Score 3 and CD30: 95%

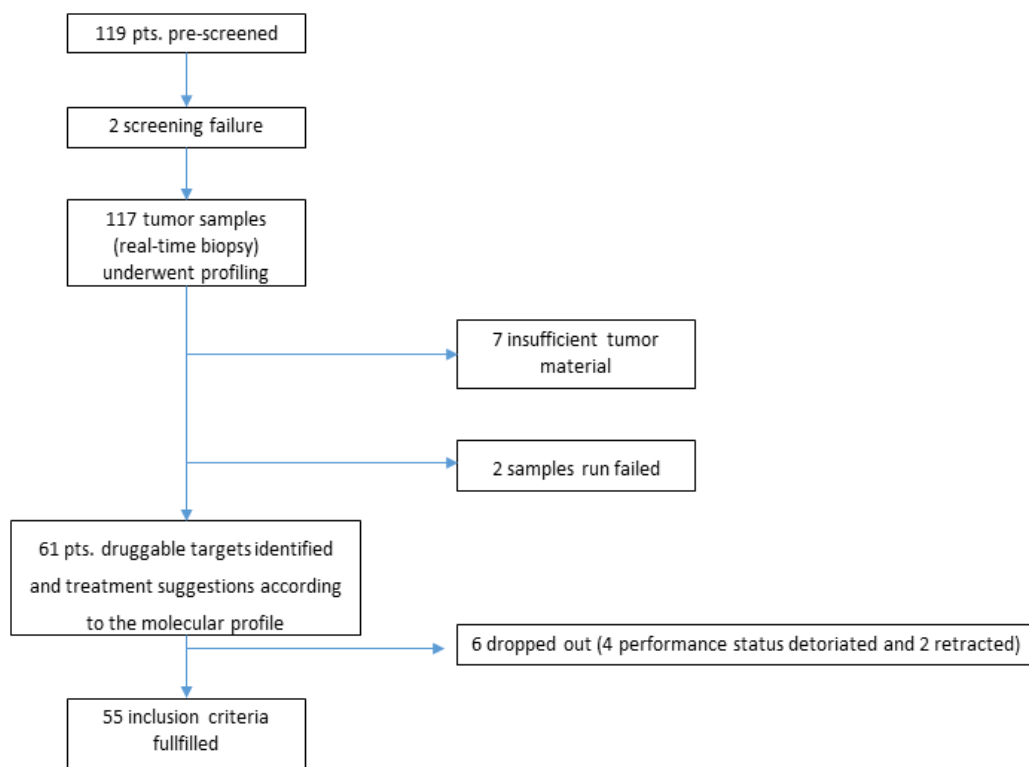

**Supplementary Figure 2: Flowchart of patients pre-screened for the EXACT trial; from 119 patients (pts.) pre-screened, in 61 patients druggable targets were identified and in 55 experimental treatment according to the respective molecular profile was initiated within the EXACT-trial, thereby fulfilling the inclusion criteria.**
